# Supplementary material for: Potential evidence for epigenetic biomarkers of metabolic syndrome in human whole blood in Latinos
Source: PubMed Central journal article supplement (PMC8555810; doi:10.1371/journal.pone.0259449), 2021-10-29
Supplement: pone.0259449.s001.pdf [file pone.0259449.s001.pdf]

**S1 Table.** Primer set information

| <b>Genes of Interest</b> | <b>Qiagen Catalog Number</b> | <b>Chromosomal Region<sup>a</sup></b> | <b>Target Sequence<sup>b</sup></b>                                                              |
|--------------------------|------------------------------|---------------------------------------|-------------------------------------------------------------------------------------------------|
| <i>ATP5E</i>             | PM00018172                   | Chr20:57,607,314 – 57,607,340         | CACCATGCTGTAG <u>C</u> GAAAG <u>C</u> GGAGCT <u>C</u> GT <u>C</u> GGG <u>C</u> GAAT <u>C</u> GC |
| <i>COX6C</i>             | PM00137830                   | Chr8:100,905,758 – 100,905,787        | <u>A</u> <u>C</u> GG <u>C</u> GGAGACACACAGTC <u>A</u> <u>C</u> GACTAAAT <u>C</u> CGA            |
| <i>RPL9</i>              | PM00196392                   | Chr4:39,460,177 – 39,460,198          | ACACTGGGGCCC <u>G</u> CTGT <u>C</u> GGTCTCCC <u>G</u> TCCTCC <u>G</u> A                         |

<sup>a</sup>Chromosomal regions based on GRCh37 Genome Reference Consortium Human Build 37 (GRCh37)

<sup>b</sup>The underlined C or G indicates the position of the CpG sites in the genes of interest
