# Supplementary material for: Potential evidence for epigenetic biomarkers of metabolic syndrome in human whole blood in Latinos
Source: PubMed Central journal article supplement (PMC8555810; doi:10.1371/journal.pone.0259449), 2021-10-29
Supplement: pone.0259449.s002.pdf [file pone.0259449.s002.pdf]

**S2 Table.** PROMO transcription factor analysis of pyrosequencing target gene regions

| <b>Gene</b>  | <b>Target Sequence for PROMO analysis</b>                                                        | <b>Putative Transcription Factor Binding Sites<sup>a</sup></b> |
|--------------|--------------------------------------------------------------------------------------------------|----------------------------------------------------------------|
| <i>ATP5E</i> | CACCATGCTGTAG <u>C</u> GAAAG <u>C</u> GGAGCT <u>C</u> GT <u>C</u> GGGC <u>C</u> GAAT <u>C</u> GC | YY1, XBP-1, GR-beta, Pax-5, p53, E2F-1                         |
| <i>COX6C</i> | A <u>C</u> GG <u>C</u> GGAGACACACAGTCAC <u>C</u> GACTAAAT <u>C</u> CGA                           | GR-beta, c-Jun, TFII-I, E2F-1, TFII-I, HNF-3alpha, AP-1        |
| <i>RPL9</i>  | ACACTGGGGCCC <u>G</u> CTGT <u>C</u> GGTCTCCC <u>G</u> TCCTCC <u>G</u> A                          | Pax-5, p53, E2F-1, TFII-I, GR-alpha, PPAR-alpha: RXR-alpha     |

<sup>a</sup>Factors predicted within a dissimilarity margin less or equal than 15%
